# Supplementary material for: BCG‐Induced Trained Immunity in Healthy Individuals: The Effect of Plasma Muramyl Dipeptide Concentrations
Source: Hindawi journal article supplement (doi:10.1155/2020/5812743), 2020-01-01

# Supplementary Figure 1

A.

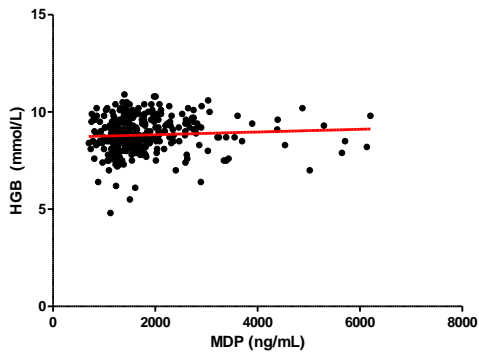

B.

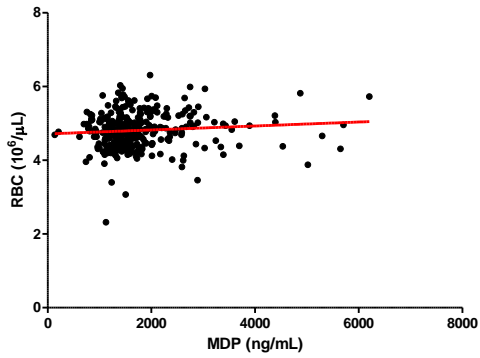

C.

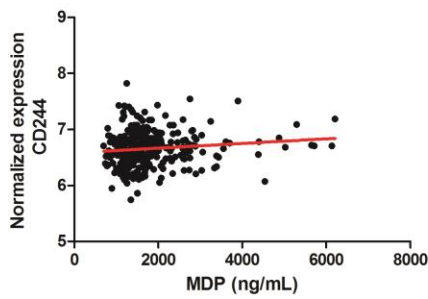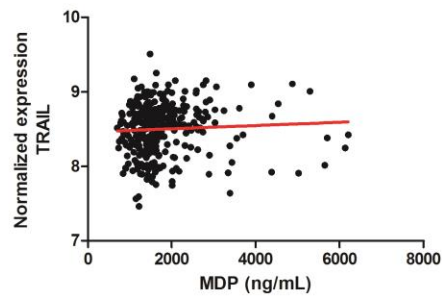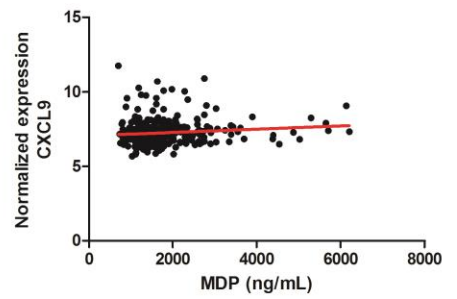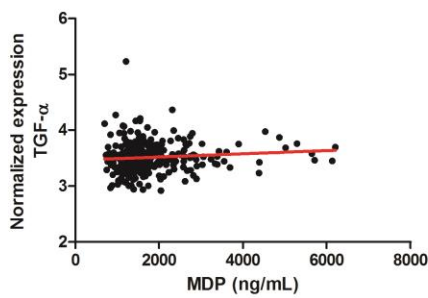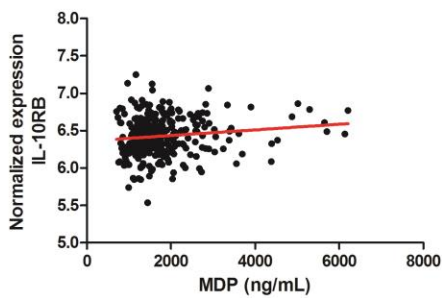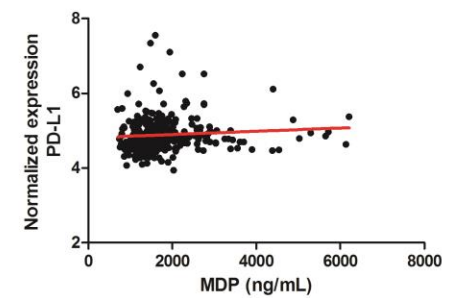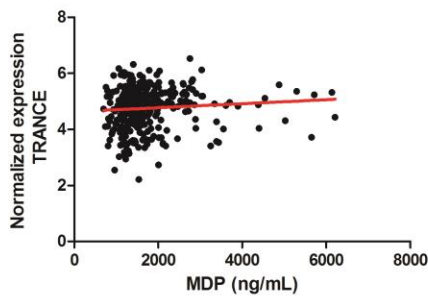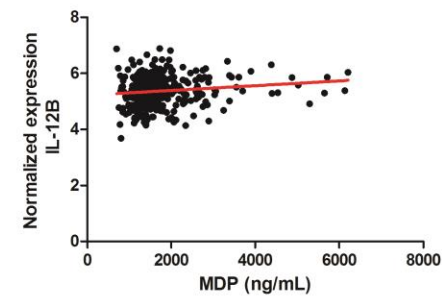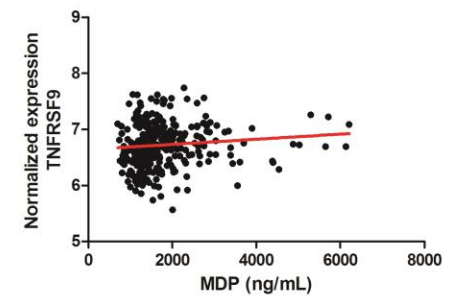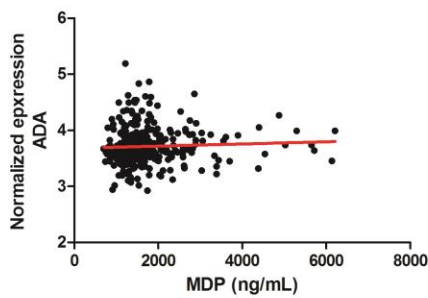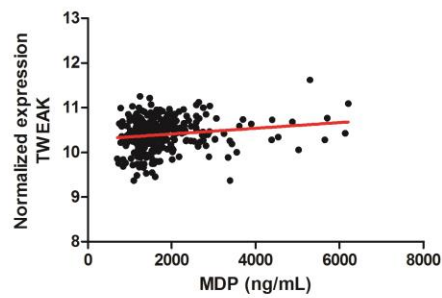

Supplementary Figure 2

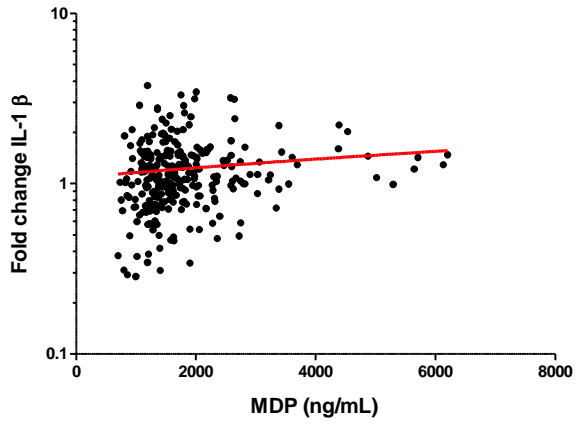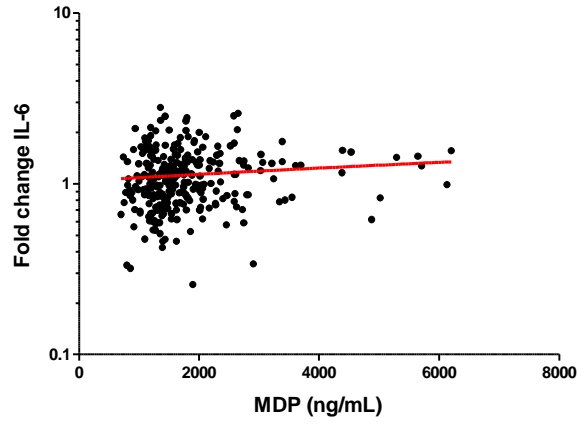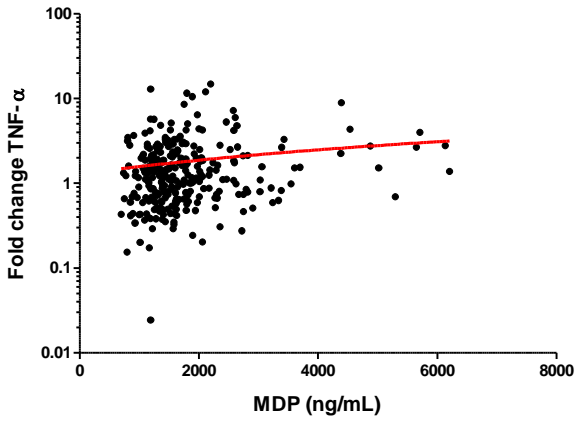

Supplementary Figure 3

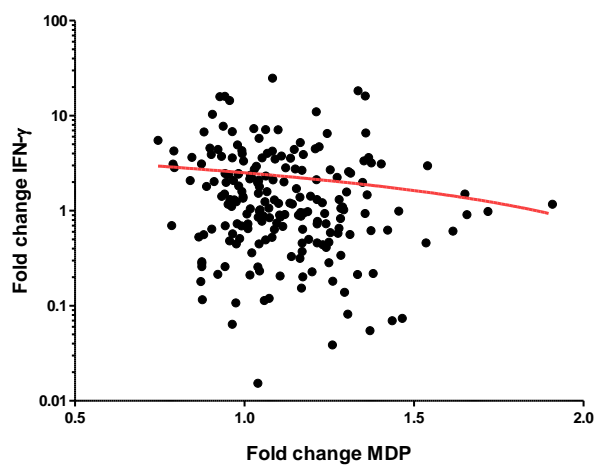

Supplement: f1 [file 5812743.f1.pdf]
